# Supplementary material
Source: publisher figshare collection journal article supplement (https://frontiersin.figshare.com/ndownloader/files/30977185)

**Supplementary Figure 3:** Validation (permutation test, 500 permutations) of the PLS-DA model shown in this study.

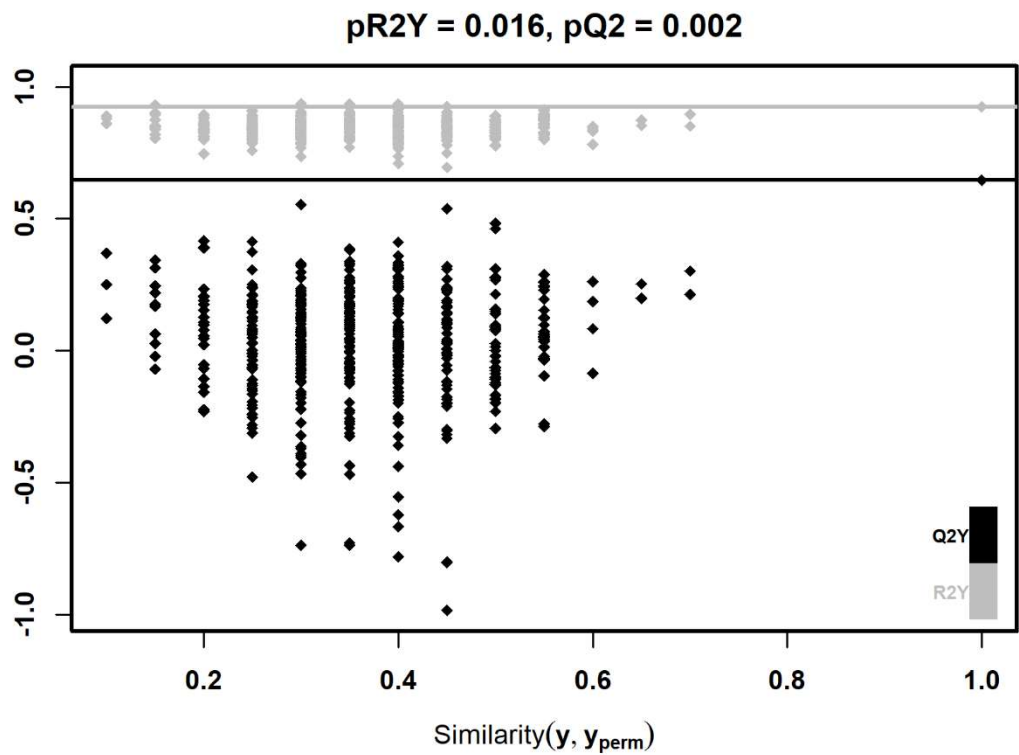

Supplement: Supplementary file [file 30977185]
